# Supplementary material
Source: Springer Nature journal article supplement (https://www.springermedizin.de/resource/supplementary/12881_2009_595_MOESM3_ESM.pdf/9451024)

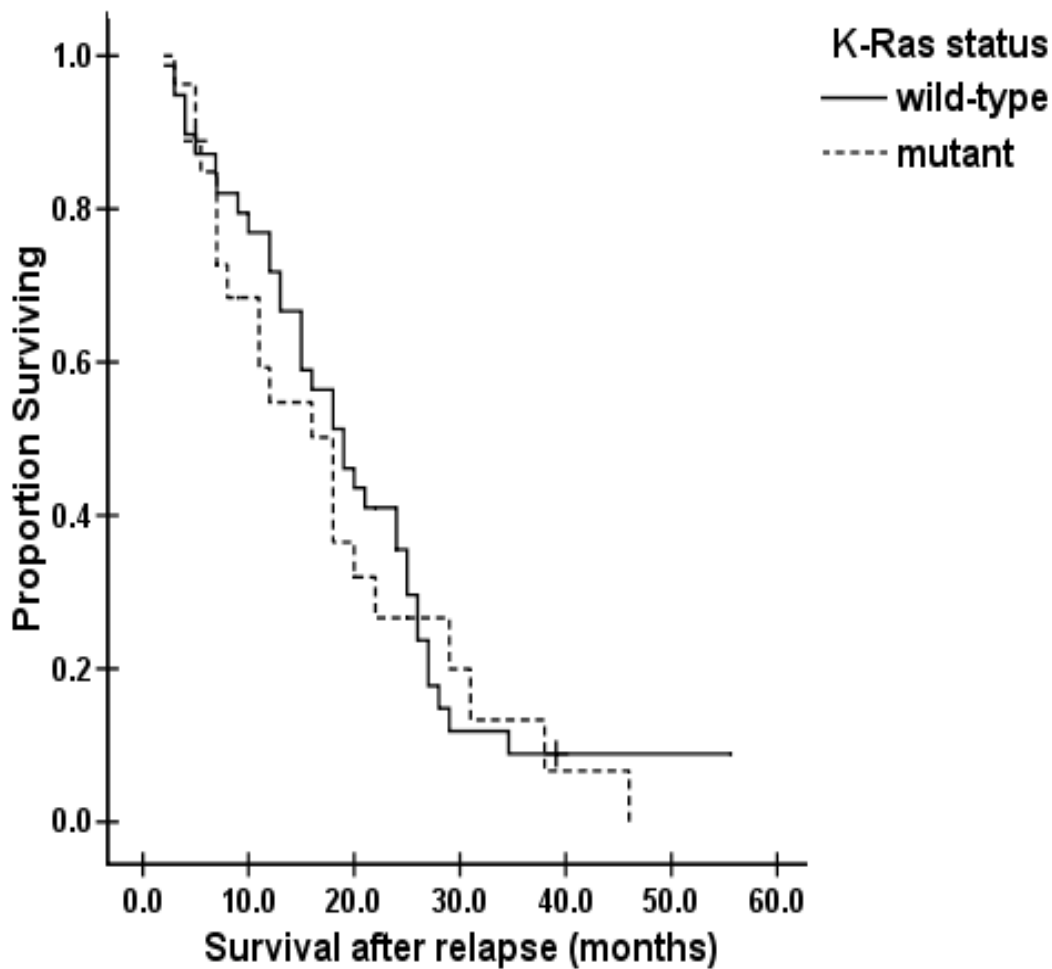

Supplement: MOESM3 [file 9451024]
